# Supplementary material
Source: PubMed Central journal article supplement (PMC3710842)
Supplement: 1216959110_pnas.201216959SI.pdf [file 1216959110_pnas.201216959SI.pdf]

# Supporting Information

Guénard et al. 10.1073/pnas.1216959110

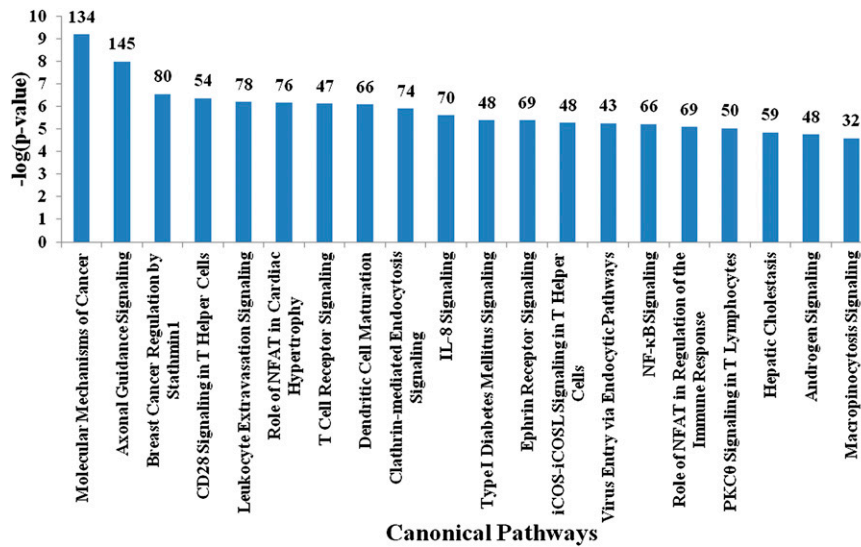

Fig. S1. Top 20 pathways identified from differential methylation and IPA analysis. The number of differentially methylated genes in each pathway is reported over histogram bars.

## Other Supporting Information Files

- [Table S1 \(DOCX\)](#)
- [Table S2 \(DOCX\)](#)
- [Table S3 \(DOCX\)](#)
- [Table S4 \(DOCX\)](#)
- [Table S5 \(DOCX\)](#)
- [Table S6 \(DOCX\)](#)
- [Table S7 \(DOCX\)](#)
- [Table S8 \(DOCX\)](#)
- [Table S9 \(DOCX\)](#)
